# Supplementary material for: Architecture and DNA Recognition Elements of the Fanconi Anemia FANCM-FAAP24 Complex
Source: PubMed Central journal article supplement — Structure. 2013 Sep 3;21(9):1648–58. doi: 10.1016/j.str.2013.07.006 (PMC3763369; doi:10.1016/j.str.2013.07.006), 2013-09-03

## Supplemental Information

### Architecture and DNA Recognition Elements of the Fanconi Anemia FANCM-FAAP24 Complex

Rachel Coulthard, Andrew J. Deans, Paolo Swuec, Maureen Bowles, Alessandro Costa, Stephen C. West, and Neil Q. McDonald

#### Inventory of Supplemental Information

Supplementary Figure S1. Electron density and structure B-factors.

[Links to Results.](#)

Supplementary Figure S2. Comparison of protein binding functions for FANCM (HhH)<sub>2</sub> domain and DNA binding for FAAP24 (HhH)<sub>2</sub> domain.

[Links to Figure 2](#)

Supplementary Figure 3. Heterodimeric interfaces within the FANCM<sub>CTD</sub>FAAP24 complex

[Links to Results.](#)

Supplementary Figure 4. Comparison of FANCM metal-ion ligands to those of A.pernix XPF and BamH1 bound to cognate DNA.

[Links to Figure 4.](#)

Supplementary Figure 5. Structural comparison of monomeric FAAP24-(HhH)<sub>2</sub> with heterodimeric FANCM<sub>CTD</sub>-FAAP24-(HhH)<sub>2</sub>.

[Links to Results.](#)

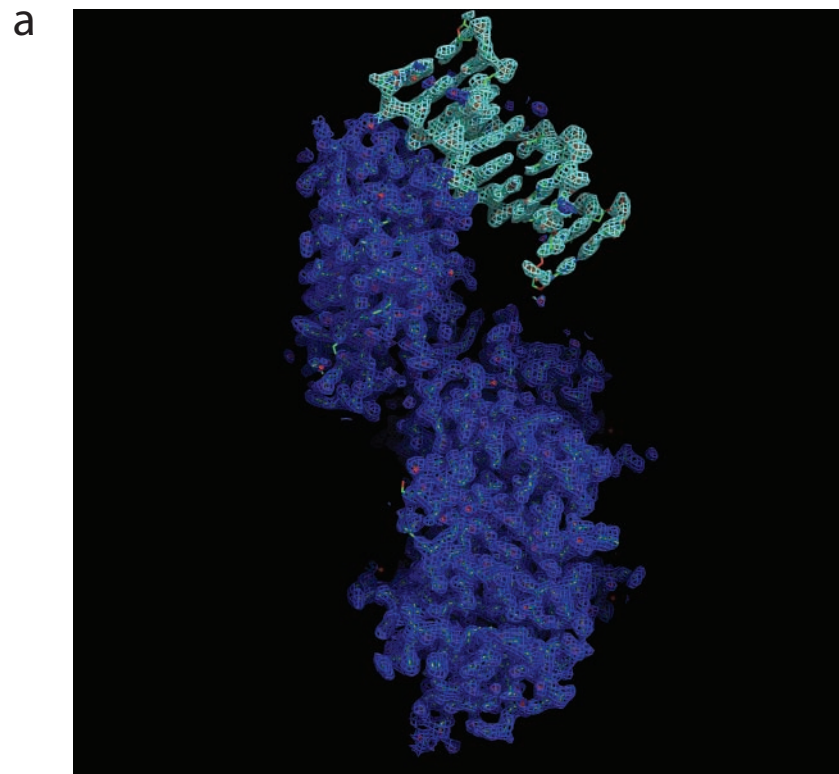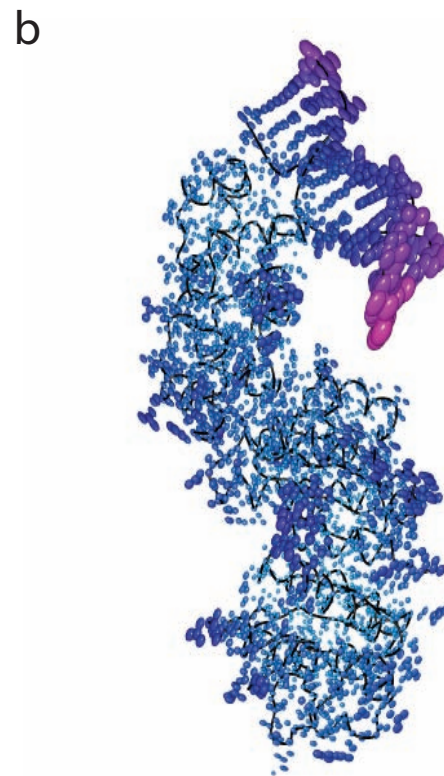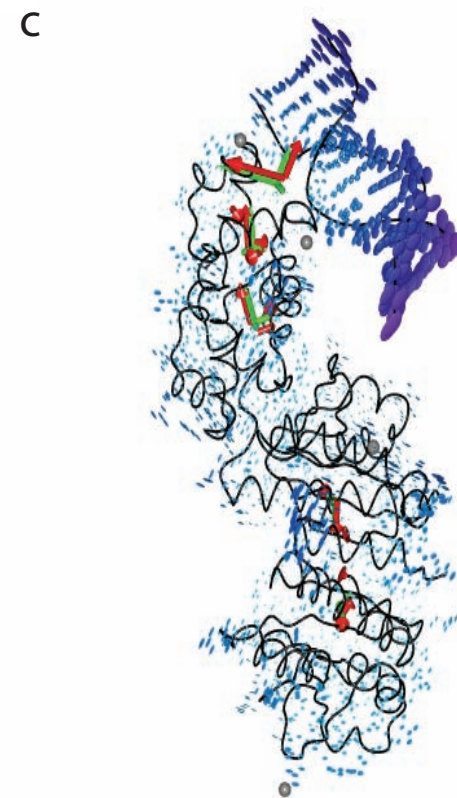



Figure S3

Coulthard et al.

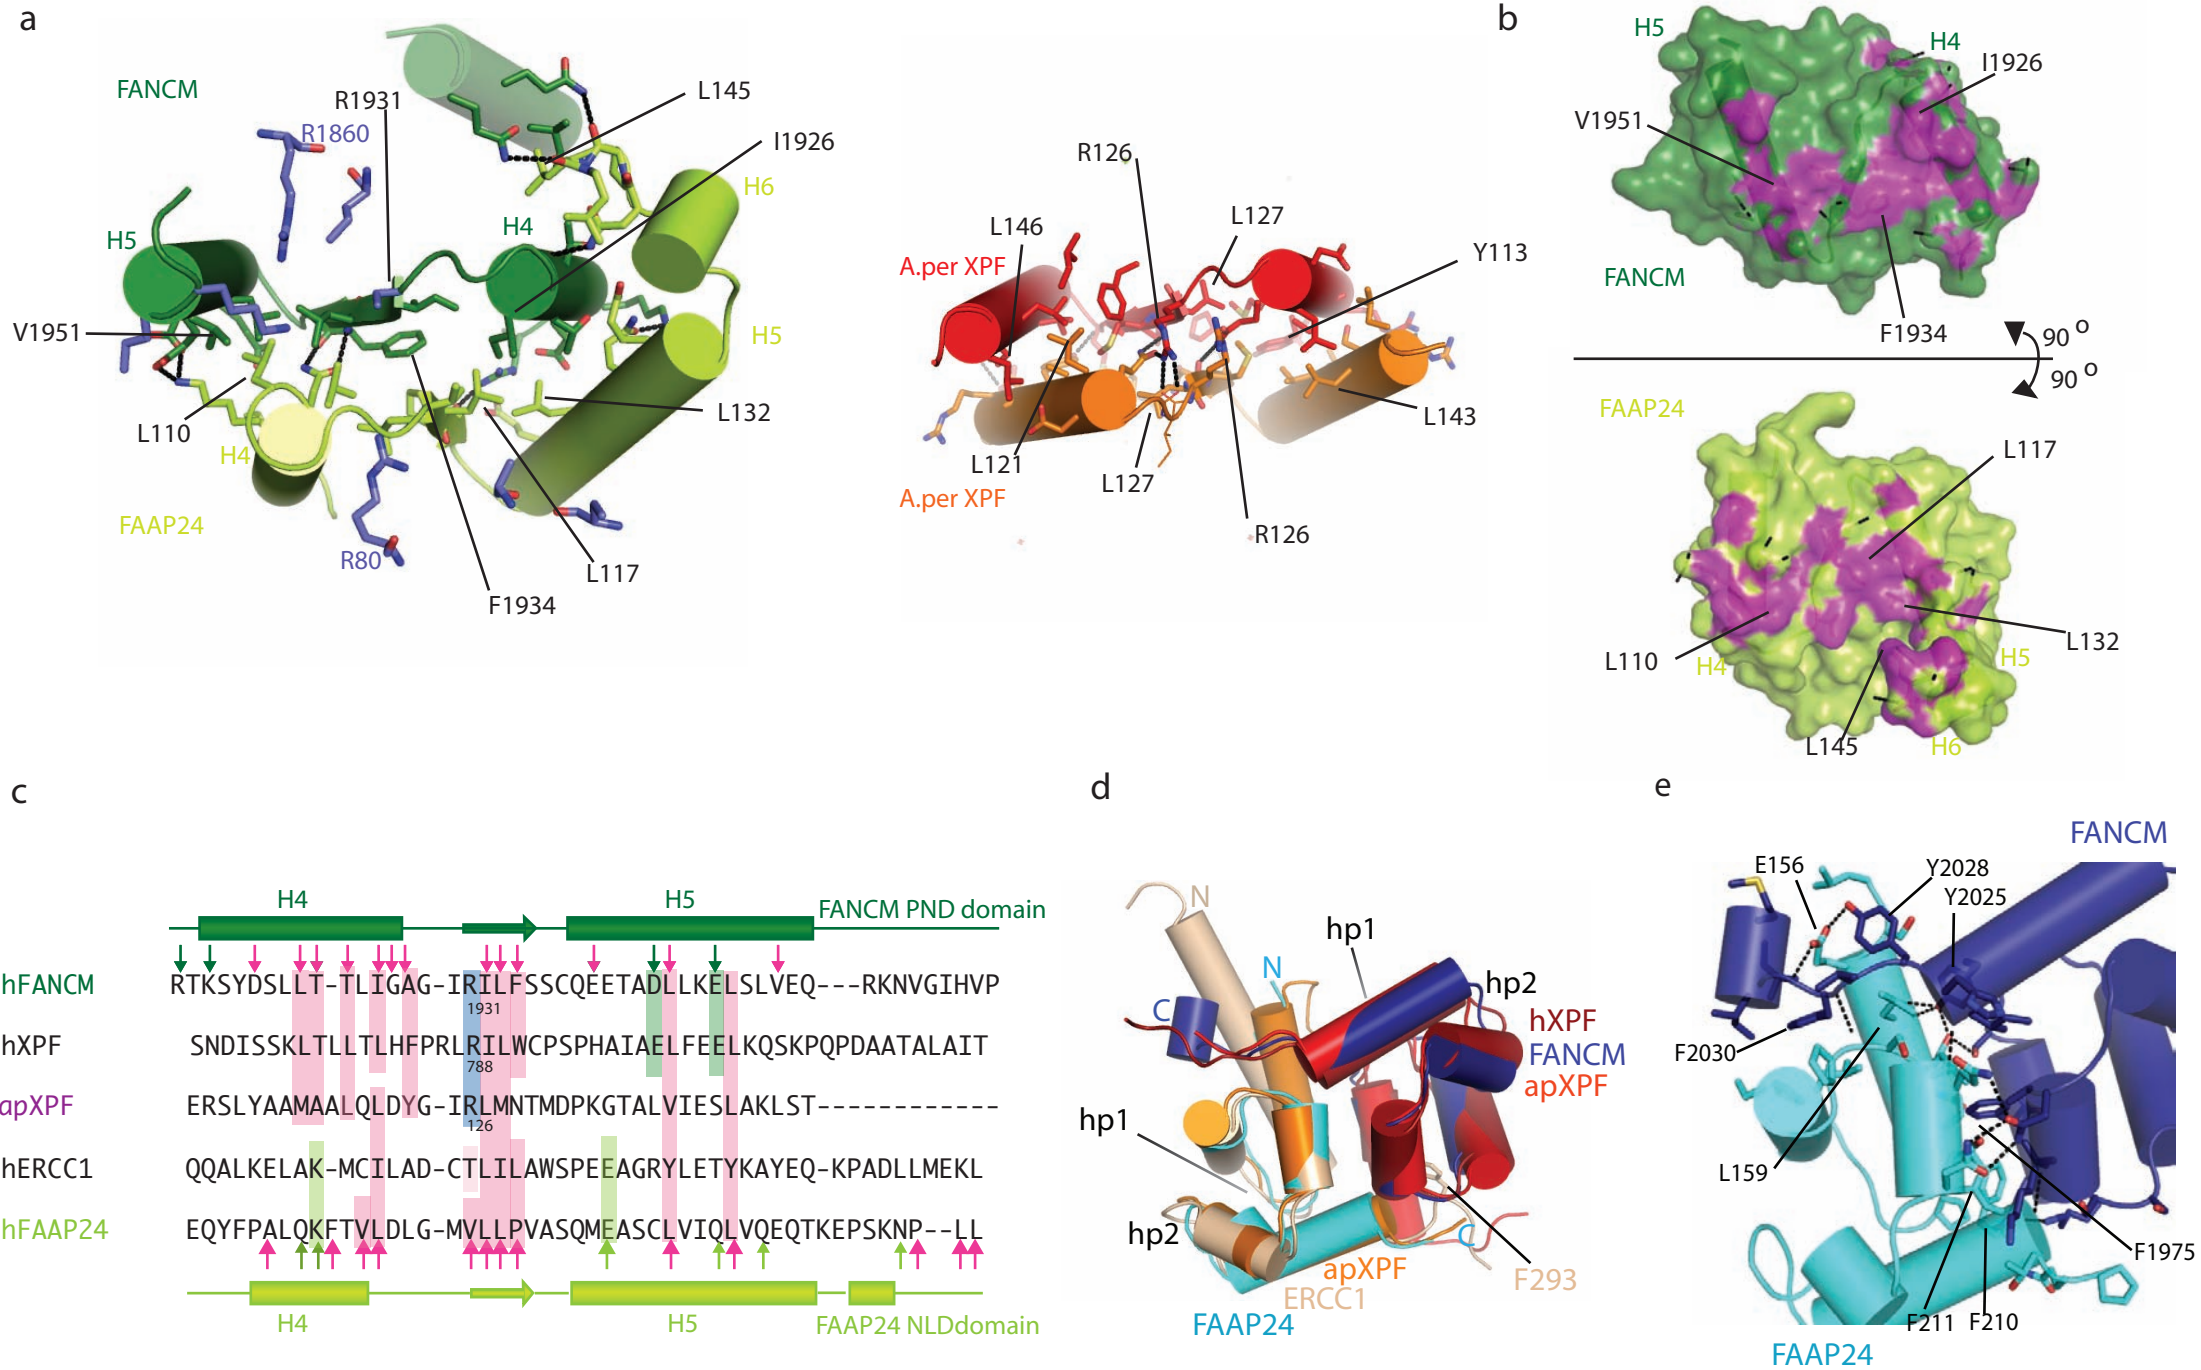



a

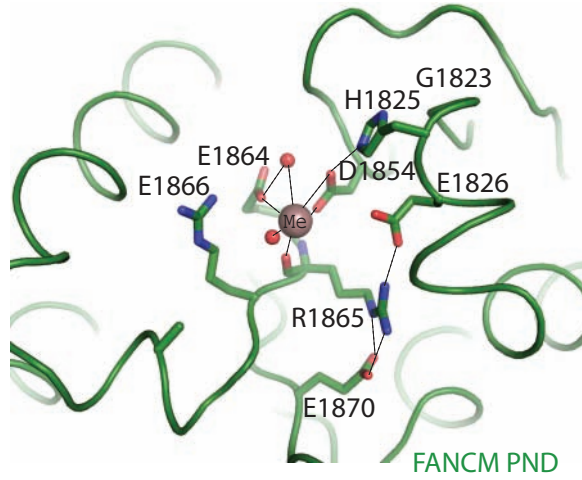

b

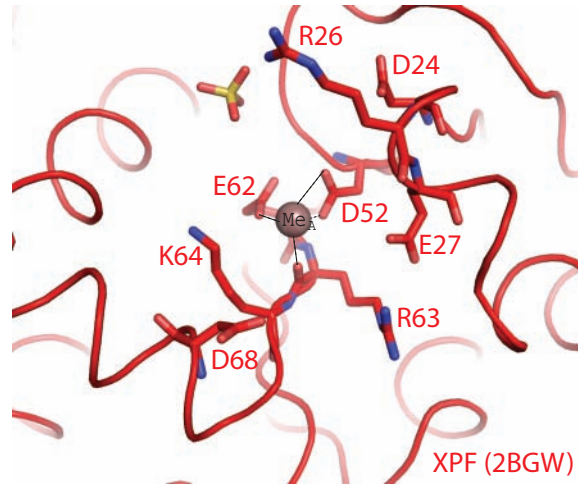

c

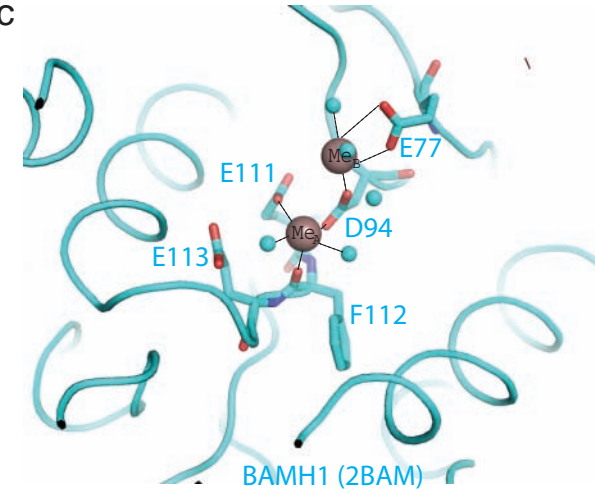

e

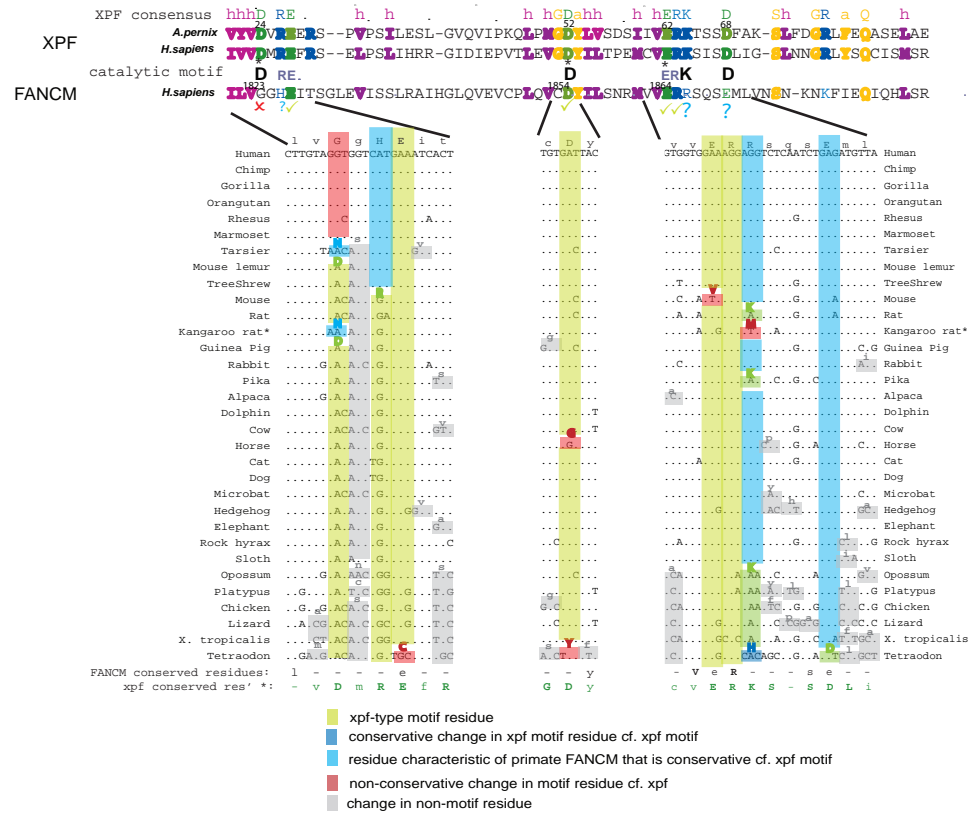

d

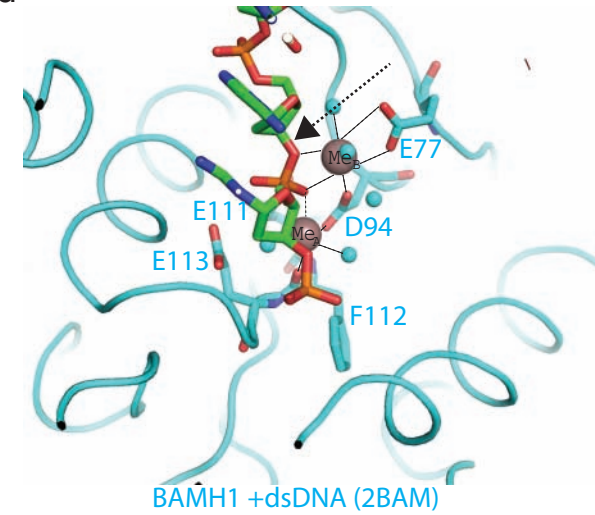

a

| input \ aligned with    |                  | FAAP24 monomer | pfXPF  | apXPF  | hXPF   | ERCC1  | RuvA   | DNA pol-iota |
|-------------------------|------------------|----------------|--------|--------|--------|--------|--------|--------------|
| heterodimeric<br>FAAP24 | aligned PDB      | 2LHY           | 1x2i-B | 2bhn-A | 2kn7-A | 1z00-B | 1d8l-A | 3epg         |
|                         | Z-score          | 4.4            | 11.8   | 9.9    | 10     | 8.4    | 7.2    | 6.4          |
|                         | rmsd (Å)         | 2.3            | 0.9    | 1.1    | 1.5    | 1.6    | 2.4    | 2.1          |
|                         | % seq identity   | 100            | 30     | 28     | 23     | 23     | 26     | 31           |
|                         | aligned residues | 51             | 60     | 60     | 60     | 60     | 58     | 52           |
| FAAP24<br>monomer       | aligned PDB      |                | zx2i-A | 2bgw-A | 2a1j-A | 1z00-B | 2ztd-B | 4ebd         |
|                         | Z-score          |                | 4.9    | 4.4    | 4.2    | 3.6    | 2.1    | 2.9          |
|                         | rmsd (Å)         |                | 2      | 10.4   | 2.9    | 2.7    | 3      | 8.5          |
|                         | % seq identity   |                | 33     | 26     | 25     | 24     | 22     | 23           |
|                         | aligned residues |                | 52     | 62     | 53     | 55     | 55     | 71           |

b

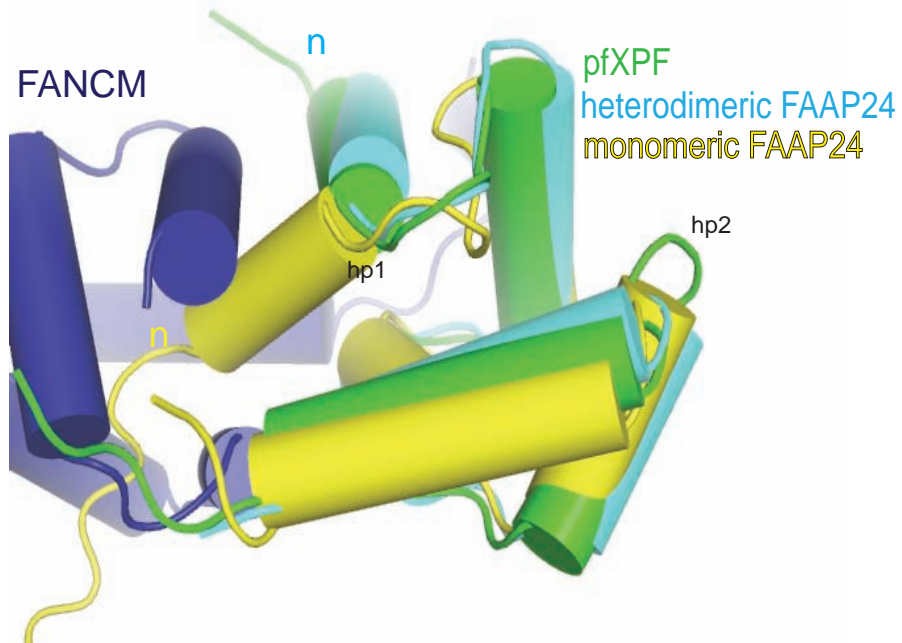

c

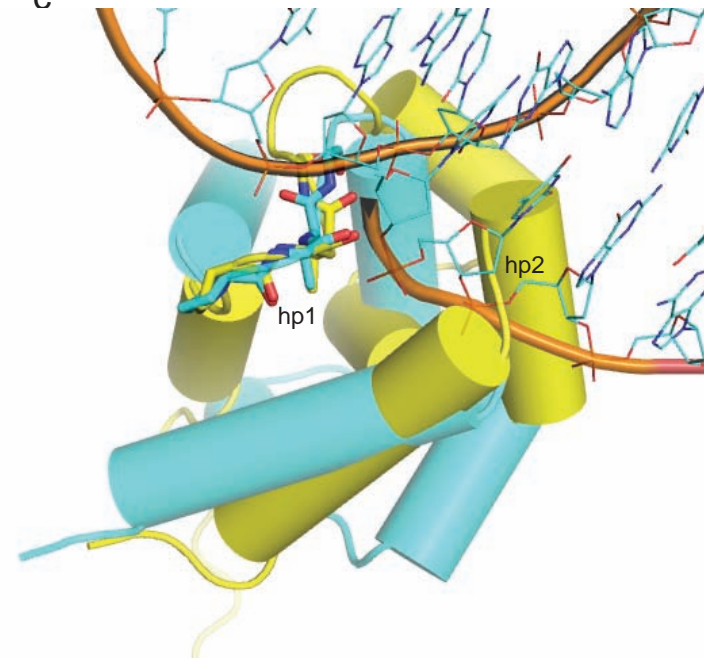

Supplement: mmc1.pdf [file mmc1.pdf]
